# Supplementary material for: Indirect regulation of HMGB1 release by gasdermin D
Source: PubMed Central journal article supplement (PMC7486936; doi:10.1038/s41467-020-18443-3), 2020-09-11
Supplement: 41467_2020_18443_MOESM1_ESM.pdf [file 41467_2020_18443_MOESM1_ESM.pdf]

## Supplementary Figure 1

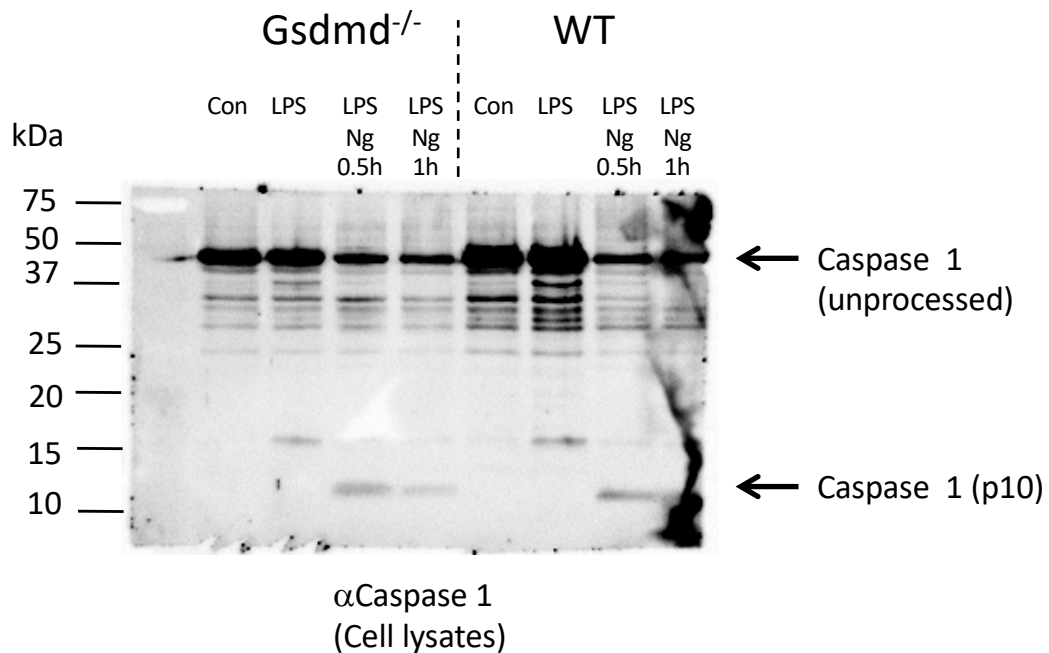

**Supplementary Figure 1 – Pyroptosis-induced caspase 1 processing in BMDM.** BMDM were prepared from wild type (WT) or gasdermin D knockout (*Gsdmd*<sup>-/-</sup>) mice. The cells were primed or not with LPS (0.5  $\mu$ g ml<sup>-1</sup>) for 5h and treated with or without nigericin (Ng, 20  $\mu$ M) as indicated. Cell lysates were prepared and immunoblotted with an anti-caspase 1 antibody. Note the appearance of the p10 fragment following LPS + Ng treatment, indicative of inflammasome activation. Data are representative of results from n=3 independent experiments.
